# Supplementary material
Source: Springer Nature journal article supplement (https://www.springermedizin.de/resource/supplementary/13002_2010_199_MOESM2_ESM.pdf/9627366)
Supplement: MOESM2 [file 9627366]

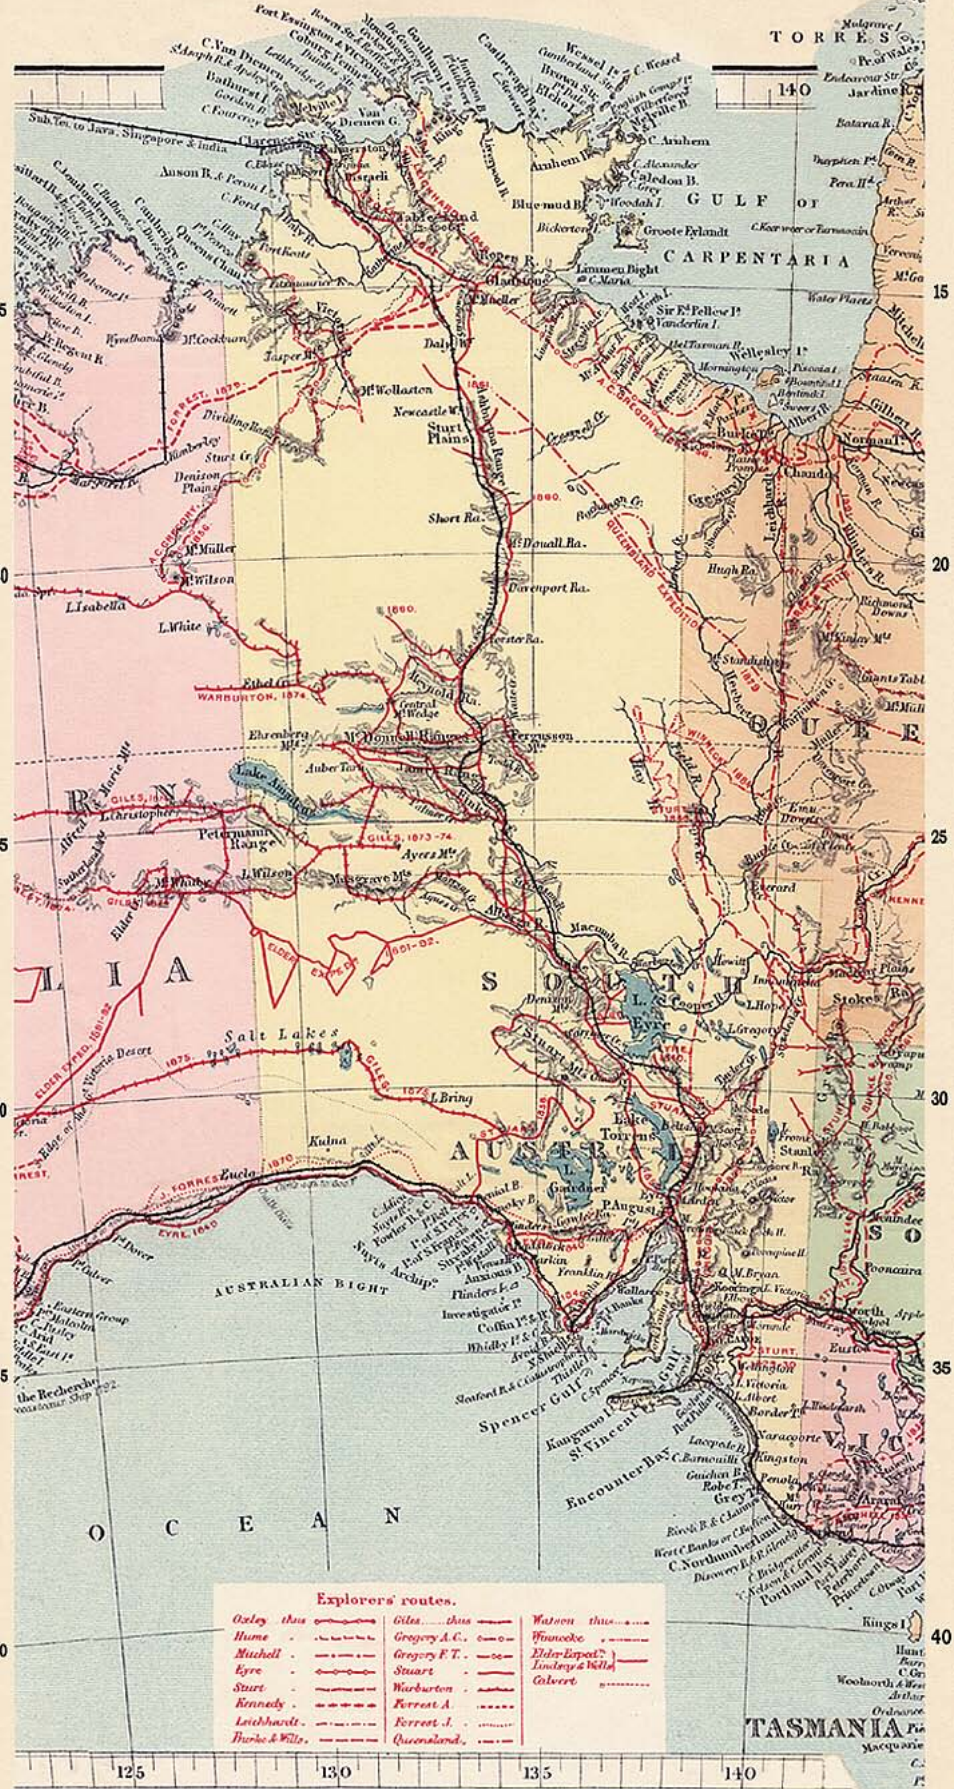

**Explorers' routes.**

|                                    |                                |                                     |
|------------------------------------|--------------------------------|-------------------------------------|
| <i>Oxley</i> thus                  | <i>Giles</i> thus              | <i>Watson</i> thus                  |
| <i>Hume</i> . . . . .              | <i>Gregory A. C.</i> . . . . . | <i>Finucane</i> . . . . .           |
| <i>Mitchell</i> . . . . .          | <i>Gregory F. T.</i> . . . . . | <i>Elder-Exped.</i> . . . . .       |
| <i>Kyre</i> . . . . .              | <i>Stuart</i> . . . . .        | <i>Linley &amp; Wells</i> . . . . . |
| <i>Sturt</i> . . . . .             | <i>Warburton</i> . . . . .     | <i>Colver</i> . . . . .             |
| <i>Kennedy</i> . . . . .           | <i>Forrest A.</i> . . . . .    |                                     |
| <i>Leichhardt</i> . . . . .        | <i>Forrest J.</i> . . . . .    |                                     |
| <i>Burke &amp; Wills</i> . . . . . | <i>Queensland</i> . . . . .    |                                     |
